# Supplementary material for: Rotational Stability of Scaphoid Osteosyntheses: An In Vitro Comparison of Small Fragment Cannulated Screws to Novel Bone Screw Sets
Source: PLoS One. 2016 Jun 3;11(6):e0156080. doi: 10.1371/journal.pone.0156080 (PMC4892476; doi:10.1371/journal.pone.0156080)
Supplement: S2 Table — (XLS) [file pone.0156080.s003.xls]

## Sheet: Tabelle2
Specimen/Side	screw	Cycles in total	Cycles during 50mNm	Cycles during 100mNm	Cycles during 150mNm	Cycles during 200mNm	Cycles during 250mNm	Cycles during 300mNm	Cycles during 350mNm	Cycles during 400mNm	Cycles during 450mNm	Cycles during 500mNm	Cycles during 550mNm	Cycles during 600mNm	Cycles during 650mNm	Cycles during 700mNm	Cycles during 750mNm	Cycles during 800mNm	Cycles during 850mNm	Cycles during 900mNm	angle during 50mNm	angle during 100mNm	angle during 150mNm	angle during 200mNm	angle during 250mNm	angle during 300mNm	angle during 350mNm	angle during 400mNm	angle during 450mNm	angle during 500mNm	angle during 550mNm	angle during 600mNm	angle during 650mNm	angle during 700mNm	angle during 750mNm	angle during 800mNm	angle during 850mNm	angle during 900mNm
25L	Twinfix®	5018	999	999	999	999	999	23	-	-	-	-	-	-	-	-	-	-	-	-	1.21	1.21	1.59	1.77	2.11	10.04	-	-	-	-	-	-	-	-	-	-	-	-
25R	BSS-obl.	6087	999	999	999	999	999	999	93	-	-	-	-	-	-	-	-	-	-	-	0.48	0.86	1.32	2.07	3.62	8.11	10.02	-	-	-	-	-	-	-	-	-	-	-
27L	Acutrak2®mini	5195	999	999	999	999	999	200	-	-	-	-	-	-	-	-	-	-	-	-	0.67	0.85	1.31	1.88	2.36	10.09	-	-	-	-	-	-	-	-	-	-	-	-
27R	BSS-obl.	8051	999	999	999	999	999	999	999	999	59	-	-	-	-	-	-	-	-	-	0.22	0.67	0.94	1.24	1.61	2.25	3.62	7.4	10.09	-	-	-	-	-	-	-	-	-
28L	Twinfix®	726	726	-	-	-	-	-	-	-	-	-	-	-	-	-	-	-	-	-	10.05	-	-	-	-	-	-	-	-	-	-	-	-	-	-	-	-	-
28R	BSS-long.	4055	999	999	999	999	59	-	-	-	-	-	-	-	-	-	-	-	-	-	0.61	1.31	1.88	6.51	10.09	-	-	-	-	-	-	-	-	-	-	-	-	-
29L	HCS®	5658	999	999	999	999	999	663	-	-	-	-	-	-	-	-	-	-	-	-	1.88	2.08	2.36	2.82	4.58	10.02	-	-	-	-	-	-	-	-	-	-	-	-
29R	BSS-obl.	8108	999	999	999	999	999	999	999	999	116	-	-	-	-	-	-	-	-	-	0.62	1.02	1.4	1.78	1.97	3.96	5.23	8	10.04	-	-	-	-	-	-	-	-	-
30L	Acutrak2®mini	1226	999	227	-	-	-	-	-	-	-	-	-	-	-	-	-	-	-	-	2.45	10.1	-	-	-	-	-	-	-	-	-	-	-	-	-	-	-	-
30R	BSS-long.	2087	999	999	89	-	-	-	-	-	-	-	-	-	-	-	-	-	-	-	0.81	4.63	10.1	-	-	-	-	-	-	-	-	-	-	-	-	-	-	-
31L	Twinfix®	4082	999	999	999	999	86	-	-	-	-	-	-	-	-	-	-	-	-	-	1.04	1.24	1.51	3.62	10.1	-	-	-	-	-	-	-	-	-	-	-	-	-
31R	BSS-obl.	7090	999	999	999	999	999	999	999	97	-	-	-	-	-	-	-	-	-	-	0.1	1.32	1.42	1.5	1.69	2.18	3.76	10.1	-	-	-	-	-	-	-	-	-	-
37L	Twinfix®	723	723	-	-	-	-	-	-	-	-	-	-	-	-	-	-	-	-	-	10.08	-	-	-	-	-	-	-	-	-	-	-	-	-	-	-	-	-
37R	BSS-obl.	3878	999	999	999	881	-	-	-	-	-	-	-	-	-	-	-	-	-	-	0.14	1.78	2.45	10	-	-	-	-	-	-	-	-	-	-	-	-	-	-
38L	HCS®	3774	999	999	999	777	-	-	-	-	-	-	-	-	-	-	-	-	-	-	1.42	1.61	2.83	10.03	-	-	-	-	-	-	-	-	-	-	-	-	-	-
38R	BSS-long.	7094	999	999	999	999	999	999	999	101	-	-	-	-	-	-	-	-	-	-	0.1	0.93	1.12	1.42	1.68	2.25	5.27	10.02	-	-	-	-	-	-	-	-	-	-
39L	Acutrak2®mini	1080	999	81	-	-	-	-	-	-	-	-	-	-	-	-	-	-	-	-	1.31	10.03	-	-	-	-	-	-	-	-	-	-	-	-	-	-	-	-
39R	BSS-obl.	3466	999	999	999	469	-	-	-	-	-	-	-	-	-	-	-	-	-	-	1.28	2.18	3.77	10.1	-	-	-	-	-	-	-	-	-	-	-	-	-	-
40L	Twinfix®	3140	999	999	999	143	-	-	-	-	-	-	-	-	-	-	-	-	-	-	2.74	3.88	6.87	10.08	-	-	-	-	-	-	-	-	-	-	-	-	-	-
40R	BSS-long.	3174	999	999	999	177	-	-	-	-	-	-	-	-	-	-	-	-	-	-	1.23	1.69	7.27	10.04	-	-	-	-	-	-	-	-	-	-	-	-	-	-
41L	HCS®	2	2	-	-	-	-	-	-	-	-	-	-	-	-	-	-	-	-	-	10.09	-	-	-	-	-	-	-	-	-	-	-	-	-	-	-	-	-
41R	BSS-obl.	9000	999	999	999	999	999	999	999	999	999	9	-	-	-	-	-	-	-	-	0.1	2.07	2.25	2.55	2.82	3.19	4.14	5.08	9.53	10.01	-	-	-	-	-	-	-	-
42L	Acutrak2®mini	6689	999	999	999	999	999	999	695	-	-	-	-	-	-	-	-	-	-	-	1.31	1.5	1.69	1.84	2.17	2.74	10.1	-	-	-	-	-	-	-	-	-	-	-
42R	BSS-long.	11391	999	999	999	999	999	999	999	999	999	999	999	402	-	-	-	-	-	-	0.16	1.12	1.23	1.5	1.69	1.96	2.15	2.44	2.73	3.3	5.26	10	-	-	-	-	-	-
43L	Twinfix®	7251	999	999	999	999	999	999	999	258	-	-	-	-	-	-	-	-	-	-	0.46	1.21	0.75	1.05	1.42	1.99	3.2	10.02	-	-	-	-	-	-	-	-	-	-
43R	BSS-obl.	9767	999	999	999	999	999	999	999	999	999	776	-	-	-	-	-	-	-	-	1.19	1.32	1.51	1.69	1.88	2.1	2.44	3.62	4.33	10.02	-	-	-	-	-	-	-	-
44L	HCS®	954	954	-	-	-	-	-	-	-	-	-	-	-	-	-	-	-	-	-	10.04	-	-	-	-	-	-	-	-	-	-	-	-	-	-	-	-	-
44R	BSS-long.	5000	999	999	999	999	999	5	-	-	-	-	-	-	-	-	-	-	-	-	1.13	1.5	1.74	2.55	9.58	10.02	-	-	-	-	-	-	-	-	-	-	-	-
45L	BSS-obl.	6473	999	999	999	999	999	999	479	-	-	-	-	-	-	-	-	-	-	-	0.11	1.61	1.69	1.88	2.25	2.82	10.02	-	-	-	-	-	-	-	-	-	-	-
45R	Acutrak2®mini	3410	999	999	999	413	-	-	-	-	-	-	-	-	-	-	-	-	-	-	1.04	1.5	2.07	10.1		-	-	-	-	-	-	-	-	-	-	-	-	-
46L	BSS-long.	7230	999	999	999	999	999	999	999	237	-	-	-	-	-	-	-	-	-	-	0.1	1.61	1.88	2.17	3.62	3.87	7.5	10.09	-	-	-	-	-	-	-	-	-	-
46R	Twinfix®	11052	999	999	999	999	999	999	999	999	999	999	999	63	-	-	-	-	-	-	1.23	1.31	1.5	1.5	1.61	1.68	1.87	2.06	2.33	2.71	5.27	10.03	-	-	-	-	-	-
47L	BSS-obl.	8119	999	999	999	999	999	999	999	999	127	-	-	-	-	-	-	-	-	-	0.1	1.89	2.08	2.25	2.55	3.62	4.25	6.97	10.09	-	-	-	-	-	-	-	-	-
47R	HCS®	3580	999	999	999	583	-	-	-	-	-	-	-	-	-	-	-	-	-	-	1.02	1.69	2.5	10.1	-	-	-	-	-	-	-	-	-	-	-	-	-	-
48L	BSS-long.	4418	999	999	999	999	422	-	-	-	-	-	-	-	-	-	-	-	-	-	0.1	1.77	1.96	2.26	10.02	-	-	-	-	-	-	-	-	-	-	-	-	-
48R	Acutrak2®mini	1999	999	999	1	-	-	-	-	-	-	-	-	-	-	-	-	-	-	-	2.45	4.52	10.04	-	-	-	-	-	-	-	-	-	-	-	-	-	-	-
49L	BSS-obl.	2735	999	999	737	-	-	-	-	-	-	-	-	-	-	-	-	-	-	-	0.38	1.78	10.06	-	-	-	-	-	-	-	-	-	-	-	-	-	-	-
49R	Twinfix®	32	32	-	-	-	-	-	-	-	-	-	-	-	-	-	-	-	-	-	10.04	-	-	-	-	-	-	-	-	-	-	-	-	-	-	-	-	-
51L	BSS-obl.	4325	999	999	999	999	329	-	-	-	-	-	-	-	-	-	-	-	-	-	0.08	1.42	1.88	2.75	10.03	-	-	-	-	-	-	-	-	-	-	-	-	-
51R	Acutrak2®mini	3102	999	999	999	105	-	-	-	-	-	-	-	-	-	-	-	-	-	-	0.56	1.13	1.99	10.03	-	-	-	-	-	-	-	-	-	-	-	-	-	-
52L	BSS-long.	9124	999	999	999	999	999	999	999	999	999	133	-	-	-	-	-	-	-	-	0.1	1.04	1.23	1.31	1.61	1.99	2.36	2.54	7.26	10.01	-	-	-	-	-	-	-	-
52R	Twinfix®	9344	999	999	999	999	999	999	999	999	999	353	-	-	-	-	-	-	-	-	0.67	0.75	0.93	1.04	1.12	1.31	1.6	1.79	2.44	10.02	-	-	-	-	-	-	-	-
53L	BSS-obl.	6055	999	999	999	999	999	999	61	-	-	-	-	-	-	-	-	-	-	-	0.1	1.58	1.69	1.74	2.11	4.85	10.03	-	-	-	-	-	-	-	-	-	-	-
53R	HCS®	5887	999	999	999	999		892	-	-	-	-	-	-	-	-	-	-	-	-	0.75	0.93	1.04	1.23	1.69	10.04	-	-	-	-	-	-	-	-	-	-	-	-
55L	BSS-obl.	11397	999	999	999	999	999	999	999	999	999	999	999	408	-	-	-	-	-	-	0.1	1.54	1.69	1.99	2.07	2.36	2.74	3	3.62	5.26	8.28	10.08	-	-	-	-	-	-
55R	Twinfix®	9769	999	999	999	999	999	999	999	999	999	778	-	-	-	-	-	-	-	-	0.48	0.45	0.48	0.56	0.67	0.85	1.05	1.24	2.25	10.02	-	-	-	-	-	-	-	-
56L	BSS-long.	5386	999	999	999	999	999	391	-	-	-	-	-	-	-	-	-	-	-	-	1.09	1.23	1.4	1.69	2.15	10.04	-	-	-	-	-	-	-	-	-	-	-	-
56R	HCS®	1	1	-	-	-	-	-	-	-	-	-	-	-	-	-	-	-	-	-	10.1	-	-	-	-	-	-	-	-	-	-	-	-	-	-	-	-	-
57L	BSS-obl.	17188	999	999	999	999	999	999	999	999	999	999	999	999	999	999	999	999	999	205	0.18	0.37	0.56	0.67	0.72	0.83	0.9	1.04	1.23	1.49	1.6	1.78	1.95	2.25	2.51	3.08	4.28	10.08
57R	Acutrak2®mini	6000	999	999	999	999	999	999	6	-	-	-	-	-	-	-	-	-	-	-	1.99	2.16	2.45	2.72	3.15	5.17	10.08	-	-	-	-	-	-	-	-	-	-	-
58L	BSS-long.	5418	999	999	999	999		423	-	-	-	-	-	-	-	-	-	-	-	-	0.1	1.04	1.42	1.69	2.17	10.02	-	-	-	-	-	-	-	-	-	-	-	-
58R	Twinfix®	10241	999	999	999	999	999	999	999	999	999	999	251	-	-	-	-	-	-	-	0.56	0.56	0.56	0.67	0.75	0.93	1.05	1.23	1.88	2.93	10.01	-	-	-	-	-	-	-
60L	BSS-long.	4082	999	999	999	999	86	-	-	-	-	-	-	-	-	-	-	-	-	-	0.24	1.31	1.99	6.41	10.09	-	-	-	-	-	-	-	-	-	-	-	-	-
60R	Acutrak2®mini	2086	999	999	88	-	-	-	-	-	-	-	-	-	-	-	-	-	-	-	1.32	1.88	10.06	-	-	-	-	-	-	-	-	-	-	-	-	-	-	-
61L	BSS-obl.	5059	999	999	999	999	999	64	-	-	-	-	-	-	-	-	-	-	-	-	0.08	2.08	2.93	4.06	8.59	10.02	-	-	-	-	-	-	-	-	-	-	-	-
61R	Twinfix®	6110	999	999	999	999	999	999	116	-	-	-	-	-	-	-	-	-	-	-	0.84	1.13	1.4	1.61	2.07	3.62	10.02	-	-	-	-	-	-	-	-	-	-	-
63L	BSS-obl.	7084	999	999	999	999	999	999	999	91	-	-	-	-	-	-	-	-	-	-	0.1	1.99	2.37	2.92	3.87	6.21	8.85	10.02	-	-	-	-	-	-	-	-	-	-
63R	Acutrak2®mini	6332	999	999	999	999	999	999	338	-	-	-	-	-	-	-	-	-	-	-	1.42	2.07	3.01	4.83	5.92	7.92	10.07	-	-	-	-	-	-	-	-	-	-	-
64L	BSS-long.	6185	999	999	999	999	999	999	191	-	-	-	-	-	-	-	-	-	-	-	0.09	1.5	1.69	1.79	1.99	2.06	10.09	-	-	-	-	-	-	-	-	-	-	-
64R	Twinfix®	7163	999	999	999	999	999	999	999	170	-	-	-	-	-	-	-	-	-	-	0.37	0.37	0.56	0.75	1.23	1.32	2.07	10.03	-	-	-	-	-	-	-	-	-	-
65L	BSS-obl.	6964	999	999	999	999	999	999	970	-	-	-	-	-	-	-	-	-	-	-	0.1	1.42	1.61	1.88	2.44	3.62	10.02	-	-	-	-	-	-	-	-	-	-	-
65R	HCS®	5577	999	999	999	999	999	582	-												0.75	1.21	1.32	1.7	2.45	10.1	-	-	-	-	-	-	-	-	-	-	-	-
66L	BSS-obl.	1143	999	144	-	-	-	-	-	-	-	-	-	-	-	-	-	-	-	-	2.44	-	-	-	-	-	-	-	-	-	-	-	-	-	-	-	-	-
66R	HCS®	3470	999	999	999	473	-	-	-	-	-	-	-	-	-	-	-	-	-	-	0.09	2.26	3.58	10.1	-	-	-	-	-	-	-	-	-	-	-	-	-	-
69L	Acutrak2®mini	6051	999	999	999	999	999	57	-	-	-	-	-	-	-	-	-	-	-	-	0.11	1.31	1.61	2.07	2.34	2.75	10.07	-	-	-	-	-	-	-	-	-	-	-
69R	BSS-long.	4155	999	999	999	999	159		-	-	-	-	-	-	-	-	-	-	-	-	0.09	1.8	2.17	3.63	10.02	-	-	-	-	-	-	-	-	-	-	-	-	-
70L	HCS®	1	1	-	-	-	-	-	-	-	-	-	-	-	-	-	-	-	-	-	10.08	-	-	-	-	-	-	-	-	-	-	-	-	-	-	-	-	-
70R	BSS-long.	6582	999	999	999	999	999	999	588	-	-	-	-	-	-	-	-	-	-	-	0.1	1.42	1.61	1.79	1.99	2.48	10.02	-	-	-	-	-	-	-	-	-	-	-
71L	HCS®	5592	999	999	999	999	999	597	-	-	-	-	-	-	-	-	-	-	-	-	0.09	1.69	2.07	2.34	2.83	10.04	-	-	-	-	-	-	-	-	-	-	-	-
71R	BSS-long.	5764	999	999	999	999	999	769	-	-	-	-	-	-	-	-	-	-	-	-	1.04	1.23	1.5	1.88	2.17	10.02	-	-	-	-	-	-	-	-	-	-	-	-
72L	Acutrak2®mini	8280	999	999	999	999	999	999	999	999	288	-	-	-	-	-	-	-	-	-	0.16	1.13	1.31	1.61	1.99	2.36	2.72	3.84	10.07	-	-	-	-	-	-	-	-	-
72R	BSS-obl.	8158	999	999	999	999	999	999	999	999	166	-	-	-	-	-	-	-	-	-	1.61	1.88	2.07	2.36	3.62	3.5	5.38	9.04	-	-	-	-	-	-	-	-	-	-
73L	Twinfix®	9040	999	999	999	999	999	999	999	999	999	49	-	-	-	-	-	-	-	-	0.61	1.5	1.69	1.78	1.69	2.07	3.62	3.57	6.02	10.08	-	-	-	-	-	-	-	-
73R	BSS-long.	5713	999	999	999	999	999	718	-	-	-	-	-	-	-	-	-	-	-	-	0.29	1.31	1.5	1.94	2.25	10.09	-	-	-	-	-	-	-	-	-	-	-	-
74L	HCS®	1999	999	999	1	-	-	-	-	-	-	-	-	-	-	-	-	-	-	-	0.89	4.52	10.04	-	-	-	-	-	-	-	-	-	-	-	-	-	-	-
74R	BSS-obl.	6060	999	999	999	999			66	-	-	-	-	-	-	-	-	-	-	-	0.29	0.48	0.93	1.42	2.5	7.25	10.03	-	-	-	-	-	-	-	-	-	-	-
75L	Acutrak2®mini	3152	999	999	999	155	-	-	-	-	-	-	-	-	-	-	-	-	-	-	0.16	1.61	2.45	10.1	-	-	-	-	-	-	-	-	-	-	-	-	-	-
75R	BSS-long.	3235	999	999	999	238	-	-	-	-	-	-	-	-	-	-	-	-	-	-	0.12	1.99	2.8	10.03	-	-	-	-	-	-	-	-	-	-	-	-	-	-
76L	BSS-long.	12388	999	999	999	999	999	999	999	999	999	999	999	400	-	-	-	-	-	-	0.09	1.12	1.23	1.31	1.5	1.61	1.68	1.87	2.06	2.25	2.54	3.67	10	-	-	-	-	-
76R	HCS®	3251	999	999	999	254	-	-	-	-	-	-	-	-	-	-	-	-	-	-	0.54	1.8	2.83	10.03	-	-	-	-	-	-	-	-	-	-	-	-	-	-
77L	BSS-long.	7449	999	999	999	999	999	999	999	456	-	-	-	-	-	-	-	-	-	-	0.1	1.04	1.23	1.42	1.61	1.87	2.36	10.09	-	-	-	-	-	-	-	-	-	-
77R	Acutrak2®mini	7476	999	999	999	999	999	999	999	483	-	-	-	-	-	-	-	-	-	-	0.11	1.23	1.23	1.4	1.5	2.15	2.56	10.1	-	-	-	-	-	-	-	-	-	-
78L	BSS-long.	999	999	-	-	-	-	-	-	-	-	-	-	-	-	-	-	-	-	-	10
78R	HCS®	1000	999	1	-	-	-	-	-	-	-	-	-	-	-	-	-	-	-	-	0.19	10.04
